# Supplementary material for: Integrative network-based approach identifies key genetic elements in breast invasive carcinoma
Source: PubMed Central journal article supplement (PMC4460623; doi:10.1186/1471-2164-16-s5-s2), 2015-05-26
Supplement: 1471-2164-16-S5-S2-S2.pdf [file 1471-2164-16-S5-S2-S2.pdf]

| <b>Data set</b>  | <b>Dataset Size</b>                                          | <b>Platform</b>                                                    |
|------------------|--------------------------------------------------------------|--------------------------------------------------------------------|
| Gene expression  | 17570 genes * 151 samples                                    | AgilentG4502A_07_3                                                 |
| DNA methylation  | 8250 genes * 151 samples                                     | Illumina_Infinium_DNA methylation array (HumanMethylation27, HM27) |
| miRNA expression | 1046 miRNAs * 151 samples                                    | IlluminaHiSeq_miRNASeq                                             |
| Somatic mutation | 90489 somatic mutations between the tumor and normal samples | IlluminaGA_DNASeq_curated                                          |
