# Supplementary material for: Integrative network-based approach identifies key genetic elements in breast invasive carcinoma
Source: PubMed Central journal article supplement (PMC4460623; doi:10.1186/1471-2164-16-s5-s2), 2015-05-26

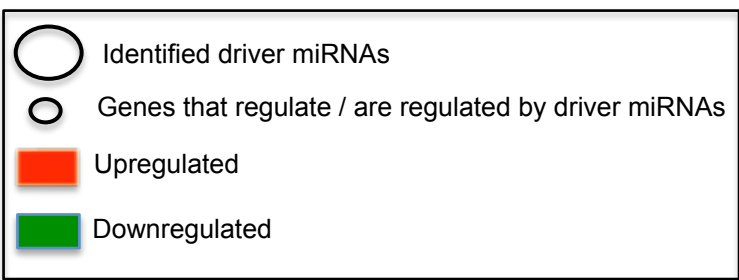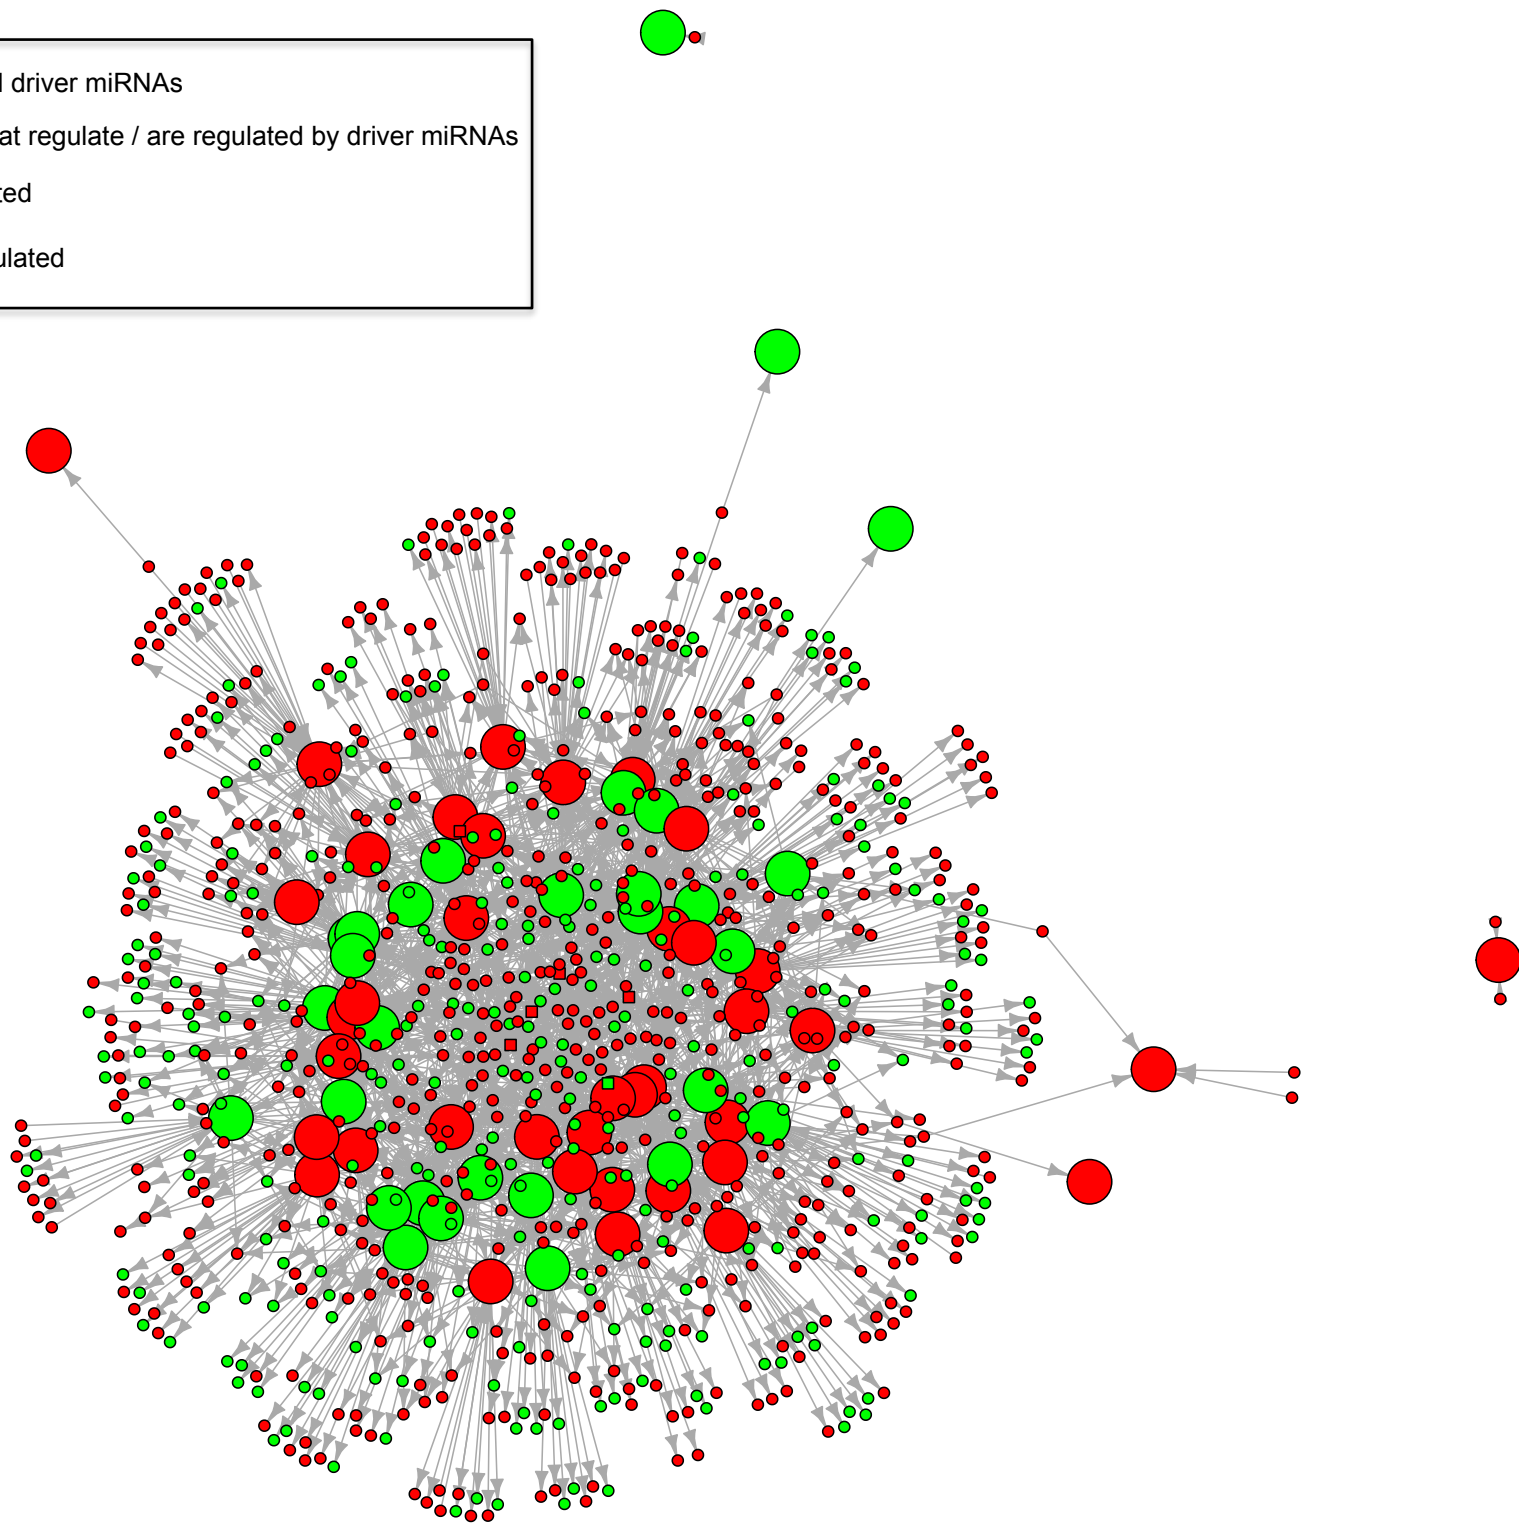

Supplement: 1471-2164-16-S5-S2-S5.pdf [file 1471-2164-16-S5-S2-S5.pdf]
