# Supplementary material for: Integrative network-based approach identifies key genetic elements in breast invasive carcinoma
Source: PubMed Central journal article supplement (PMC4460623; doi:10.1186/1471-2164-16-s5-s2), 2015-05-26
Supplement: 1471-2164-16-S5-S2-S6.pdf [file 1471-2164-16-S5-S2-S6.pdf]

| <b>miRNA</b>   | <b>Chrom</b> | <b>SNP Position</b> | <b>SNP occurring gene</b> | <b>Genomic distance (in bp)</b> |
|----------------|--------------|---------------------|---------------------------|---------------------------------|
| hsa-mir-181b-1 | 1            | 198711494 *         | PTPRC                     | 116508                          |
| hsa-mir-181a-1 | 1            | 198711494 *         | PTPRC                     | 116679                          |
| hsa-mir-1290   | 1            | 19186120 *          | TAS1R2                    | 37445                           |
| hsa-mir-9-1    | 1            | 156498803 *         | IQGAP3                    | -108670                         |
| hsa-mir-205    | 1            | 209605636 *         | MIR205HG                  | -158                            |
| hsa-mir-3129   | 2            | 189928732           | COL5A2                    | 69030                           |
| hsa-mir-145    | 5            | 148730786 *         | GRPEL2                    | 79423                           |
| hsa-mir-143    | 5            | 148730786 *         | GRPEL2                    | 77695                           |
| hsa-mir-106b   | 7            | 99662436 *          | ZNF3                      | 29180                           |
| hsa-mir-93     | 7            | 99662436 *          | ZNF3                      | 28955                           |
| hsa-mir-25     | 7            | 99662436 *          | ZNF3                      | 28747                           |
| hsa-mir-320a   | 8            | 22136963 *          | PIWIL2                    | -34488                          |
| hsa-mir-199b   | 9            | 131048299           | SWI5                      | -41299                          |
| hsa-mir-199b   | 9            | 131023779           | GOLGA2                    | -16779                          |
| hsa-mir-152    | 17           | 46136186            | NFE2L1                    | -21659                          |
| hsa-mir-520d   | 19           | 54254529            | MIR522                    | -31179                          |
| hsa-mir-519e   | 19           | 54254529            | MIR522                    | -71335                          |
| hsa-mir-1323   | 19           | 54254529            | MIR522                    | -79307                          |
| hsa-mir-199a-1 | 19           | 10870471            | DNM2                      | 57631                           |
| hsa-let-7f-2   | X            | 53644041            | HUWE1                     | -59888                          |
| hsa-mir-718    | X            | 153278098           | IRAK1                     | 7273                            |
