# Supplementary material for: Integrative network-based approach identifies key genetic elements in breast invasive carcinoma
Source: PubMed Central journal article supplement (PMC4460623; doi:10.1186/1471-2164-16-s5-s2), 2015-05-26
Supplement: 1471-2164-16-S5-S2-S8.pdf [file 1471-2164-16-S5-S2-S8.pdf]

| Target gene | Drug and antineoplastic agents                                                                                   | CTD | PharmGKB | Cancer Resource |
|-------------|------------------------------------------------------------------------------------------------------------------|-----|----------|-----------------|
| ABCB8       | docetaxel; Cyclosporine; Progesterone                                                                            | 1   | 0        | 0               |
| ABCG4       | indole-3 carbinol; Methotrexate; exemestane; Vincristine                                                         | 1   | 0        | 0               |
| AHCTF1      | Methotrexate; bisphenol A                                                                                        | 1   | 0        | 0               |
| AKT1        | U 0126;tyrphostin AG 1478; Ursodeoxycholic Acid;Valproic Acid;tyrphostin AG 1024; trametinib; Tretinoin          | 1   | 0        | 1               |
| APOC1       | tanshinone; Quercetin; Fluorouracil; bexarotene; Cisplatin; Tamoxifen                                            | 1   | 0        | 1               |
| AR          | Dihydrotestosterone; Acetylcysteine; celecoxib                                                                   | 1   | 0        | 0               |
| ATF6        | Nelfinavir; Tretinoin;bisphenol A; Cyclosporine; Curcumin                                                        | 1   | 0        | 0               |
| ATG4C       | epigallocatechin gallate                                                                                         | 1   | 0        | 0               |
| ATP1B1      | resveratrol; Ranitidine; vorinostat; Genistein; Progesterone; epigallocatechin gallate                           | 1   | 0        | 0               |
| B4GALT7     | Cytarabine; Cyclosporine                                                                                         | 1   | 0        | 0               |
| BIRC6       | Diethrin; Cyclosporine; Cisplatin; Fluorouracil; Doxorubicin; Epirubicin;Estradiol; zoledronic acid; bisphenol A | 1   | 0        | 0               |
| BRCA1       | Tretinoin; trichostatin A; Estradiol; transplatin; troglitazone; Tunicamycin; fulvestrant                        | 1   | 0        | 1               |
| CA6         | Tretinoin;Carmustine                                                                                             | 1   | 0        | 0               |
| CCDC130     | Quercetin;Tamoxifen;Cyclosporine;bisphenol A                                                                     | 1   | 0        | 0               |
| CCDC92      | Quercetin; Folic Acid                                                                                            | 1   | 0        | 0               |
| CD2         | Dexamethasone; Methotrexate; Cyclophosphamide                                                                    | 1   | 0        | 0               |
| CD79B       | Cyclophosphamide                                                                                                 | 1   | 0        | 0               |
| CDC34       | Estradiol; bortezomib; Fluorouracil; Tamoxifen                                                                   | 1   | 0        | 0               |
| DAPK1       | paclitaxel;gemcitabine                                                                                           | 0   | 1        | 0               |
| EGR1        | Fluorouracil; gemcitabine                                                                                        | 0   | 0        | 1               |
| ESR1        | exemestane;tamoxifen                                                                                             | 0   | 1        | 1               |
| JUN         | andrographolide; cinnamic aldehyde; Daunorubicin; decitabine; Cisplatin;Doxorubicin                              | 0   | 0        | 1               |
| LRRC28      | gemcitabine                                                                                                      | 0   | 0        | 1               |
| MYB         | Fluorouracil;gemcitabine;Quercetin                                                                               | 0   | 0        | 1               |
| MYC         | alitreionin; Amsarcine; bicalutamide; Camptothecin; decitabine; Cisplatin; Doxorubicin                           | 0   | 0        | 1               |
| NFKB1       | Curcumin; decitabine; Doxorubicin; Echinomycin; Fluorouracil; gefitinib; indole-3-carbinol; parthenolide         | 0   | 0        | 1               |
| NQO2        | doxorubicin; cyclophosphamide                                                                                    | 0   | 1        | 0               |
| OS9         | alitreionin                                                                                                      | 0   | 0        | 1               |
| SP1         | Etoposide; indole-3-carbinol; Ionidamine; Quercetin; Adaphostin                                                  | 0   | 0        | 1               |
| STAT3       | azaspirane; bisphenol A; Capsaicin; Fluorouracil; interferon alfacon-1; resveratrol;sulindac sulfide; Tamoxifen  | 0   | 0        | 1               |
| TGFB1       | Doxorubicin; Fluorouracil; Thalidomide; Entinostat; Hyaluronidase                                                | 0   | 0        | 1               |
| TP53        | 4-biphenylmine; alliin; Apigenin; Atropine;bicalutamide;butylidenephthalide                                      | 0   | 0        | 1               |
