# Supplementary material for: Integrative network-based approach identifies key genetic elements in breast invasive carcinoma
Source: PubMed Central journal article supplement (PMC4460623; doi:10.1186/1471-2164-16-s5-s2), 2015-05-26
Supplement: 1471-2164-16-S5-S2-S9.pdf [file 1471-2164-16-S5-S2-S9.pdf]

| <b>Category</b>     | <b>Enriched term</b>                                                                           | <b>P-value</b> |
|---------------------|------------------------------------------------------------------------------------------------|----------------|
| GO functional terms | GO:0006357~regulation of transcription from RNA polymerase II promoter                         | 6.67E-09       |
|                     | GO:0006355~regulation of transcription, DNA-dependent                                          | 1.15E-07       |
|                     | GO:0006350~transcription                                                                       | 1.59E-07       |
|                     | GO:0051252~regulation of RNA metabolic process                                                 | 1.75E-07       |
|                     | GO:0045449~regulation of transcription                                                         | 1.96E-07       |
|                     | GO:0034645~cellular macromolecule biosynthetic process                                         | 1.08E-06       |
|                     | GO:0019219~regulation of nucleobase, nucleoside, nucleotide and nucleic acid metabolic process | 1.10E-06       |
|                     | GO:0010556~regulation of macromolecule biosynthetic process                                    | 1.24E-06       |
|                     | GO:0009059~macromolecule biosynthetic process                                                  | 1.26E-06       |
|                     | GO:0051171~regulation of nitrogen compound metabolic process                                   | 1.33E-06       |
| KEGG pathways       | hsa05223:Non-small cell lung cancer                                                            | 2.48E-03       |
|                     | hsa04110:Cell cycle                                                                            | 3.42E-03       |
|                     | hsa05215:Prostate cancer                                                                       | 1.01E-02       |
|                     | hsa05219:Bladder cancer                                                                        | 1.91E-02       |
|                     | hsa05200:Pathways in cancer                                                                    | 2.32E-02       |
|                     | hsa05214:Glioma                                                                                | 4.06E-02       |
